1 \*Corresponding author: Department of Earth & Environmental Sciences, 195 University  
2 Avenue, Rutgers University, Newark, NJ 07102, USA; [angelo.soto@rutgers.edu](mailto:angelo.soto@rutgers.edu)  
3

4 Running header: Species limits in Minor Red Bats  
5

6 **Biogeography and Validation of species limits in Caribbean Red Bats (Vespertilionidae:**  
7 ***Lasiurus*)**  
8

9 J. Angel Soto-Centeno\* and Camilo A. Calderón-Acevedo  
10

11 *Department of Earth & Environmental Sciences, 195 University Avenue, Rutgers University,*  
12 *Newark, NJ 07102, USA (JAS-C and CAC-A) and Department of Mammalogy, 200 Central Park*  
13 *West, American Museum of Natural History, New York, NY 10024, USA*

14 *\*[angelo.soto@rutgers.edu](mailto:angelo.soto@rutgers.edu) (JAS-C) and [camilo.calderon@rutgers.edu](mailto:camilo.calderon@rutgers.edu) (CCA)*  
15

16  
17  
18  
19  
20  
21  
22  
23  
24  
25  
26  
27  
28  
29  
30  
31  
32  
33  
34  
35  
36  
37

## ABSTRACT

Defining species limits using an integrative framework is crucial for biodiversity assessments and to maintain taxonomic stability. These approaches are robust and can be useful to also validate the status of species that are uncommon and underrepresented in biological collections. We examined the species limits and validated the taxonomic status of the Minor Red Bat (*Lasiurus minor*), an uncommon species originally described from four specimens. Our approach consisted of three independent lines of evidence combining genetic and phenotypic data. Phylogenetic analyses confirmed the uniqueness of *L. minor* compared to three other geographically and closely related Red Bat species. Furthermore, coalescent species delimitation supported the four Red Bat species hypothesis. Linear phenotypic analyses demonstrated that *L. minor* is distinct from other Red Bats despite a morphological continuum. Finally, we reassessed the diagnosability of characters used to describe *L. minor* using an objective shape analysis approach, which emphasized the support for this taxon. Based on our findings, while identification in the field could still pose a challenge, there is strong support to recognize *L. minor*. This study settles a longstanding taxonomic question and provides evidence to better understand Caribbean biodiversity.

## KEYWORDS

Chiroptera, Morphology, Phylogenetics, Species Delimitation, Integrative Taxonomy, Vespertilionidae, West Indies

38  
39  
40  
41  
42  
43  
44  
45  
46  
47  
48  
49  
50  
51  
52  
53  
54  
55  
56  
57  
58  
59  
60

## INTRODUCTION

Species delimitation relies strongly on the integration of diverse types of data and their complementarity to assess biologically relevant units (Carstens et al. 2013). Understanding species limits is essential to maintaining a stable taxonomy, improve the robustness of species assignment decisions, and develop accurate measures of biodiversity (Fujita et al. 2012). Because species form the basic unit of taxonomy, this process is also important for ecology and conservation biology, which inferences rely on the proper designation of species. Current methods for examining species limits provide an opportunity to also validate the limits of previously described taxa under a robust framework of integrative taxonomy (Padiál et al. 2010). Thus, providing a chance to overcome the challenges presented by the revision of species that are uncommon, cryptic, and/or with few representative samples.

Caribbean Red Bats (genus *Lasiurus*) exemplify one of the most poorly documented groups across the Greater Antilles and the Bahamas (Silva Taboada 1979; Gannon et al. 2005; Speer et al. 2015; Soto-Centeno et al. 2017). Two taxonomic hypotheses of Caribbean Red Bats have been proposed based primarily on limited phenotypic or genetic data. Some authors have considered Caribbean Red Bats a complex of three species (sensu Miller 1931), i.e. *Lasiurus degelidus* (Jamaica), *L. minor* (the Bahamas, Hispaniola, and Puerto Rico), and *L. pfeifferi* (Cuba); yet others considered all Caribbean Red Bats as a single species attributed to *L. borealis* (sensu Koopman et al. 1957). Studies have confirmed the unique taxonomic identities of the Cuban and Jamaican Red Bats confirming the original designation of Miller (1931) (Baker et al. 1988; Baird et al. 2015).

61           The Minor Red Bat (*Lasiurus minor*) has received considerable attention regarding its  
62 taxonomic status. This species was described by Miller (1931) on the basis of four skulls  
63 retrieved from owl pellets collected in Voute l'Église cave in Jacmel, Haiti. The skulls of *L.*  
64 *minor* were characterized as “noticeably smaller” than those of its congeners from Cuba (*L.*  
65 *pfeifferi*) and Jamaica (*L. degelidus*) with variation in four characters (Miller 1931). These four  
66 characters, when compared with *L. borealis*, were a braincase “more rounded when viewed from  
67 above, and more flat-topped when viewed from behind; lacrimal ridge and tubercle poorly  
68 developed; upper cheekteeth essentially like those of *L. borealis borealis* except that PM<sup>4</sup> is  
69 smaller” (Miller 1931, p.410). Two Red Bat specimens collected on Cat Island and New  
70 Providence, the Bahamas, were also conferred to *L. minor*, extending the distribution of this  
71 species (Allen and Sanborn 1937). In a revision of Red Bats from the Bahamas, Koopman et al.  
72 (1957) agreed with Allen and Sanborn (1937) that the Bahamian species are best conferred to *L.*  
73 *minor*. Notwithstanding, they concluded that given the paucity of the available material and the  
74 lack of suitable diagnostic characters, *L. minor* should be considered a “race” of *L. borealis*  
75 (Koopman et al. 1957, p.168). The first Red Bat report from Puerto Rico described a specimen  
76 with general features of the skull most closely resembling the description of *L. minor* from Haiti  
77 (Starret and Rolle 1962). Yet the most recent record reported of a reproductive Red Bat female  
78 for the island followed the taxonomic proposal of Koopman et al. (1957) of *L. borealis minor*  
79 (Rodríguez-Durán 1999). Still, despite that no recent or thorough revisions to test the species  
80 limits have been made, the taxon *Lasiurus minor* (Miller 1913) remains valid (Simmons 2005;  
81 Lim et al. 2017; Simmons and Cirranello 2020).

82

83           In this study, we provide independent evidence to validate the species limits of the Minor  
84 Red Bat (*Lasiurus minor*, Vespertilionidae). Specifically, we tested the hypothesis that *L. minor*  
85 constitutes a unique lineage at the species level that is distinct both genetically and  
86 morphologically from other Red Bats that are closely related and geographically adjacent. We  
87 used a species validation approach to provide additional support to the recognition of this taxon  
88 under an integrative and statistically robust framework.

89

90

## MATERIALS AND METHODS

91

92

93

94

95

96

97

98

99

100

101

102

103

104

105

*Gene sequences.*—We compiled all available sequences for a fragment of the mitochondrial cytochrome oxidase I (COI) gene encompassing 657 bp in length. Sequences were obtained from already published records of Red Bats (*Lasiurus blossevillii*, *L. borealis*, *L. frantzi*, *L. minor*, *L. pfeifferi*, and *L. seminolus*) included in (Streicker et al. 2010; Clare et al. 2011; Baird et al. 2015; Lim et al. 2017). Identical sequences were excluded from all analyses and the resulting set of sequences (N = 50) was aligned using the Muscle algorithm in Geneious Prime v2020.1.2 (Biomatters Ltd.). A single COI sequence of the big brown bat (*Eptesicus fuscus*) from Virginia, USA was included as outgroup in the phylogenetic analysis. Alignment file used in this study is available in fasta format and archived in <http://dx.doi.org/10.17632/79m4fj8rdx.1>.

*Phylogenetic inference.*—To estimate the phylogenetic relationships and specifically determine the position of *L. minor* among all other Red Bats, we used a Maximum Likelihood approach implemented in RAxML-NG (Kozlov et al. 2019). This analysis consisted of a GTR+G model of substitution and run over 50 independent tree searches using 25 random and 25

106 parsimony-based starting trees to produce the best scoring topology. This analysis was repeated  
107 in three independent inference runs and loglikelihoods were compared by computing the  
108 topological Robinson-Foulds (RF) distances to ensure a thorough exploration of the likelihood  
109 surface (Robinson and Foulds 1981). Branch support was inferred by computing 1000 MRE-  
110 based bootstrap replicates (Pattengale et al. 2010) where an auto MRE cutoff of 0.03 was used to  
111 automatically assess if sufficient replicates were performed. The summarized branch support was  
112 computed as Transfer Bootstrap Expectation (TBE; Lemoine et al. 2018) metrics from all  
113 bootstrap replicates plotted onto the best topology. TBE can reliably recover support because it is  
114 based on the minimum transfer distance between a given branch and any other branch in the  
115 bootstrap replicate tree (Lemoine et al. 2018).

116

117 *Species delimitation.*—Our primary goal was to examine the validity and species limits of  
118 *L. minor* in relation to other Red Bats of geographically close species from the Caribbean and the  
119 Southeastern United States. Thus, following the same approach as above, and considering the  
120 conclusion of Koopman et al. (1957), we developed a concise alignment only including unique  
121 sequences (N = 33) of our Red Bat focus group: *L. borealis*, *L. minor*, *L. pfeifferi* and *L.*  
122 *seminolus*. Species limits within these Red Bats were examined using two independent  
123 approaches with the single mitochondrial COI locus.

124

125 First, we analyzed limits using the multi-rate Poisson Tree Process, a tree-based method  
126 that can accommodate different rates of coalescence within clades and is optimized to handle  
127 barcoding loci (mPTP; Kapli et al. 2017). The mPTP analysis was run in the server  
128 <https://mcmc-mptp.h-its.org/mcmc> and used a non-ultrametric tree for the focal taxa produced in

129 RAxML-NG. The MCMC runs included  $10 \times 10^6$  generations that were sampled every 10  
130 thousand after a 10% burn-in. Three separate analyses were set with different starting  
131 delimitation models: null model (i.e. all taxa considered as one species), maximum likelihood  
132 model (i.e. MLE based delimitation), and random model (i.e. random delimitation). In each  
133 analysis, the option *--multi* was used to include the intra-specific differences among rates of  
134 coalescence with a minimum branch length of 0.001.

135

136         Second, we also tested species limits using the Bayesian coalescent-based approach BPP  
137 v4.2.9 (Yang and Rannala 2014) following the guidelines of Flouri et al. (2018). We ran an  
138 initial species tree estimation (A01 analysis) using the fixed maximum likelihood tree as a guide,  
139 a diffuse prior for  $\theta$  in which  $\alpha = 3$  and  $\beta$  was estimated from the mutation rate for the available  
140 COI sequences. The diffuse prior of  $\tau$  included  $\alpha = 3$  and adjusting  $\beta$  ranging from 0.02 to 0.002  
141 on multiple test runs to ensure convergence of the mean onto the divergence estimate of *L.*  
142 *borealis* in Baird et al. (2015). Additionally, we used an unguided delimitation analysis (A11  
143 analysis) to compare the consistency of the resulting species limits. Each run consisted of an  
144 MCMC chain of  $2 \times 10^6$  generations, sampling every second generation with a 10% burn-in.  
145 Species delimitation was tested in five independent runs to ensure the reliability of results.  
146 Convergence was determined by examining the loglikelihood values of each run using Tracer  
147 v1.7 (Rambaut et al. 2018).

148

149         *Specimen data.*—To examine phenotypic differences among Red Bat species, we  
150 obtained 147 crania and dentaries as loan from *L. borealis* (N = 78), *L. pfeifferi* (N = 1), and *L.*  
151 *seminolus* (N = 69) deposited in the Department of Mammalogy at American Museum of Natural

152 History (Supplementary Data S1). Recent specimens of *L. minor* are notoriously  
153 underrepresented in museum collections that are broadly available to the scientific community,  
154 in part due to the rarity of this species and the paucity of systematic collection efforts. Thus, our  
155 sample for this species constituted 88 fossil elements collected from Trouing Jean Paul (TJP), a  
156 limestone sinkhole cave located in Parc National La Visite, Massif de la Selle, Haiti (18.33°N, -  
157 72.28°W) and described in (Soto-Centeno et al. 2017). This locality is about 50 km east of the  
158 type locality for *L. minor*. TJP is a high elevation site (~1825 m) excavated in February 1984 by  
159 a field team led by Charles A. Woods. Relevant documentation associated with the fossil  
160 excavations were obtained by C. A. Woods at the Florida Museum of Natural History, University  
161 of Florida (UF). These fossils were loaned to us for identification and study by the UF Division  
162 of Vertebrate Paleontology, where permits and field notes are archived. Radiocarbon date  
163 analysis of the fossil *L. minor* indicated that these specimens ranged from 1690–570 cal. yr. BP  
164 (2 $\sigma$ ; Soto-Centeno et al. 2017). The total number of specimens measured from the focus Red Bat  
165 species was 236.

166

167 *Morphology: machine learning classification models.*—We measured seven cranial  
168 characters to the nearest 0.01 mm from 226 Red Bat specimens (see Specimen Data) using  
169 digital calipers (Mitutoyo, Japan). Each measurement was taken three times to account for error.  
170 The characters examined included post orbital width, the premolar to molar distance, the distance  
171 between proximate ridge of the nasal to the distal point of the occipital lobe, the length of the  
172 palate, the condylobasal length, the length of the narrowest point of distal surfaces of the  
173 pterygoid plates, and the distance between the anterior most point of the glenoid fossa to the  
174 origin of the masseter muscle (see Jacobs 1996). Some measurements could not be recorded



175 because several *L. minor* fossils were fragmented. Thus, to maximize our sample size, we  
176 partitioned the data per species and used the multivariate imputation by chained equations  
177 approach in the R package *mice* (Van Buuren and Groothuis-Oudshoorn 2011) ensuring that all  
178 measurements in each species did not exceed 40% missing data before imputation (Penone et al.  
179 2014). Final dataset used in this study is available as a text file and archived in  
180 <http://dx.doi.org/10.17632/79m4fj8rdx.1>.

181  
182 We used these seven cranial measurements to test the hypothesis that *L. borealis*, *L.*  
183 *minor*, and *L. seminolus* form diagnosable phenotypic groups. *Lasiurus pfeifferi* was not included  
184 in this and subsequent morphological analyses because the N = 1 precluded examination of  
185 variability and violated the assumptions of the model. To examine phenotypic divergence, we  
186 built a classification model under a supervised machine learning approach of Linear  
187 Discriminant Analysis (LDA) in the R packages *caret* (Kuhn 2020) and *MASS* (Venables and  
188 Ripley 2002). The classification model was trained using a 75% random data partition and then  
189 tested using the remaining 25% of the data implementing a k-fold cross validation approach of  
190 five replicates. We then computed a confusion matrix to calculate model accuracy, or how well  
191 the classifier assigned each species to its correct group, and then evaluated whether the overall  
192 accuracy rate was greater than the no-information rate (Kuhn and Johnson 2013). Phenotypic  
193 limits were examined on a two-dimensional plot of the first two linear discriminants.

194  
195 *Morphology: elliptical Fourier shape descriptors and gaussian models.*—We tested the  
196 validity and ability of the characters proposed by Miller (1931) to distinguish *L. minor* from *L.*  
197 *borealis* and *L. seminolus* using an objective approach for shape quantification. To quantify the

198 shapes of these four characters (see Introduction), we traced the contour of each from digital  
199 photographs of the skull using Adobe Photoshop (CC 2019) and ImageJ (Schneider et al. 2012).  
200 The specific contours were: 1) the braincase from a dorsal view, following the contour of the  
201 skull from the narrowest post orbital point around the braincase, including the frontal, parietal,  
202 squamosal, and post parietal but excluding the occipital condyle, the mastoid process, and  
203 zygomatic arch (N = 24 *L. borealis*, 29 *L. minor*, and 18 *L. seminolus*); 2) the posterior of the  
204 skull from the left mastoid process, reaching the top of the skull and descending into the right  
205 mastoid process (N = 27 *L. borealis*, 39 *L. minor*, and 21 *L. seminolus*); 3) the contour of the  
206 prefrontal and frontal bone margins around the lacrimal ridge from a dorsal view (N = 26 *L.*  
207 *borealis*, 37 *L. minor*, and 19 *L. seminolus*); and 4) the shape of the last upper premolar (PM<sup>4</sup>; N  
208 = 28 *L. borealis* and 38 *L. minor*) from a lateral view (Supplementary Data SD2).

209

210         Bitmap formatted images of the contours were analyzed in the software SHAPE v1.3  
211 (Iwata and Ukai 2002). Each was transformed into chain code, assigning a string of code that  
212 represented the contour of every individual image of the diagnostic characters of *L. minor*. We  
213 used each contour to create a harmonic or elliptical Fourier descriptor (EFDs) series. This was  
214 used to quantify the shape of the diagnostic characters of *L. minor* in comparison to *L. borealis*  
215 and *L. seminolus*. The harmonics depict different coordinates or descriptors of a shape, which  
216 were used as input for a Principal Component Analysis (PCA) to determine the position of each  
217 species in morphospace. We allowed SHAPE v1.3 to select the number of effective principal  
218 components that best explained shape variation within our sample.

219

220 PCA scores of the EFD series represent morphological characters of biological  
221 significance. Therefore, we used the scores to examine the ability of each character to  
222 discriminate between the three Red Bat species. We fit gaussian mixture models (GMMs;  
223 McLachlan and Peel 2000; McLachlan et al. 2019) on those PCA scores. GMMs provide a  
224 statistical framework that extend ordination analyses like PCA. This method uses the mixture of  
225 probability distributions underlying a continuous character dataset. It allows to examine the  
226 combination of distributions that better explain the phenotypic variation in a mixture of  
227 components (i.e. morphological clusters) present in the dataset, and can be used as a guided  
228 discriminant analysis (Fraley and Raftery 2002). The parameters of GMMs include means and  
229 variance-covariance matrices, which describe the phenotypes of groups detected among  
230 specimens depending on the normal distributions underlying the Principal Components derived  
231 from the SHAPE analysis. This flexible and objective framework allowed to test the  
232 discrimination power of the original characters described by Miller (1931) in a model based  
233 discriminant analysis using the MclustDA function in the R package *Mclust* v5.4.7 (Scrucca et  
234 al. 2016). Output files from SHAPE v1.3 are available as native files archived in  
235 <http://dx.doi.org/10.17632/79m4fj8rdx.1>.

236

## 237 RESULTS

238 *Phylogenetics and species limits.*—Phylogenetic analysis of the mitochondrial COI gene  
239 clarified relationships among Red Bats from the Caribbean and the Southeastern United States  
240 (Fig. 1). The best topology resulted in a final  $-\ln = -2789.362$ . Each species in our focus group  
241 (i.e. *L. borealis*, *L. minor*, *L. pfeifferi*, and *L. seminolus*) formed well supported monophyletic  
242 clades. COI was not variable enough to resolve the position of *L. frantzii*, although this taxon  
243 was outside the scope of the study. For our focus group, uncorrected p genetic distances within

244 species were below 1%. In contrast, the COI gene between geographically close species shows at  
245 least 5% divergence in *L. pfeifferi* from Cuba and *L. seminolus* from Southeast US, and up to 9%  
246 divergence between *L. pfeifferi* and the geographically nearby *L. minor* from Dominican  
247 Republic (see Supplementary Data SD3).

248

249 The species tree analyses confirmed that our focus group consists of four species of Red  
250 Bats (Fig. 1). The three independent methods used as starting delimitation in the mPTP analyses  
251 (i.e. null model, maximum likelihood, or random) all strongly inferred the four species tree.  
252 Across all combinations of prior settings, BPP analyses rejected the null hypotheses that the four  
253 Red Bats in our focus group belong to a single species. The guided (A10) and unguided (A11)  
254 analyses in BPP strongly supported that our focus group consists of four species. However, these  
255 analyses could not specifically resolve the position of *L. minor* relative to its conspecifics (Table  
256 1). Overall guided and unguided analyses in BPP resulted in three alternative topologies,  
257 including one identical to Fig. 1, with a combined best posterior probability ranging from 0.982  
258 to 0.997 (Table 1).

259

260 *Morphology.*—The percent group separation achieved by the linear discriminants were  
261 86.9 for LD1 and 13.1 for LD2. The machine learning LDA classifier of phenotypic limits in  
262 Red Bats had an overall accuracy of 77.3% (95% CI: 70.3–81.8%), which was significantly  
263 greater than the no information rate ( $P < 0.005$ ). The greatest extent of phenotypic overlap was  
264 observed between *L. borealis* and *L. seminolus* with 22% and 28% incorrectly assigned among  
265 these species, respectively (Fig. 2). The classifier achieved better separation of *L. minor* from *L.*

266 *borealis* and *L. seminolus*. Notwithstanding, 10% and 5% of *L. minor* were incorrectly assigned  
267 to *L. borealis* and *L. seminolus*, respectively (Fig. 2).

268

269 The PCAs of four different character shapes showed that *L. minor* occupies a section of  
270 morphospace that overlapped with some *L. borealis* or *L. seminolus* (Fig. 3A, B, D). In contrast,  
271 the shape of the lacrimal ridge showed little overlap with other species and a more cohesive  
272 cluster of *L. minor* (Fig. 3C). Despite some overlap in morphospace with *L. borealis* and *L.*  
273 *seminolus*, *L. minor* tended to occupy a section of morphospace with rounder and flatter skulls  
274 and last upper premolar with a less pronounced hypoconal basin. These, coupled with the poorly  
275 developed lacrimal ridge, supported the use of these diagnostic characters by Miller (1931). The  
276 gaussian model discriminant analysis did reliably identify and discriminate between all three Red  
277 Bat species. The roundness and flatness of the skull showed a classification error rate of 80% in  
278 GMM. The last upper premolar and the lacrimal ridge were more diagnosable characters, with an  
279 error rate of 90% and 97%, respectively.

280

281

## DISCUSSION

282 A major principle of integrative taxonomy is to provide an objective framework using  
283 multiple lines of evidence to examine patterns of species divergence to evaluate taxonomic  
284 status. The use of different criteria to validate species (e.g. lineage monophyly and  
285 morphological distinctiveness) can resolve species limits by providing the evidence necessary to  
286 reject or support existing taxonomic hypotheses (Coyne and Orr 2004). Furthermore, these  
287 methods can aid in untangling the complexity of different evolutionary histories that contribute  
288 to differentiation (de Queiroz 2005). Our goal was to provide a robust framework to validate the

289 hypothesis that the Minor Red Bat (*Lasiurus minor*) constitutes a unique lineage at the species  
290 level that is distinct from other Red Bats. Thereby, providing taxonomic stability and clear the  
291 disagreements on this Caribbean Red Bat group (Miller 1931; Allen and Sanborn 1937;  
292 Koopman et al. 1957; Starret and Rolle 1962; Rodríguez-Durán 1999; Gannon et al. 2005;  
293 Simmons 2005; Cláudio 2019; Simmons and Cirranello 2020) The results of our study based on  
294 an integrative approach of multiple data types and analyses showed support for the recognition of  
295 *L. minor* (Miller 1931).

296

297 Two recent studies examined Red Bats in a phylogenetic context. Baird et al. (2015)  
298 confirmed the phylogenetic relationships of *L. borealis* as an early divergent lineage sister to *L.*  
299 *pfeifferi* and *L. seminolus*. However, no samples of *L. minor* were available in that study to  
300 examine the phylogenetic placement this Caribbean Red Bat lineage. Lim et al. (2017) in a broad  
301 phylogenetic survey of the bats of Dominican Republic produced the first sequences of *L. minor*.  
302 All four samples originate from Parque Nacional Armando Bermúdez, near Pico Duarte, the  
303 highest peak in the entire Caribbean. These samples of *L. minor*, however, were only discussed  
304 in the context of interspecific comparisons of genetic variation among all bats in the Dominican  
305 Republic (Table 2 in Lim et al. 2017).

306

307 Herein, the phylogenetic and species delimitation analyses confirm the uniqueness of *L.*  
308 *minor* and support the four species hypothesis (i.e. *L. borealis*, *L. minor*, *L. pfeifferi*, and *L.*  
309 *seminolus*; Fig. 1). Among these four focal taxa, our phylogenetic analysis showed *L. borealis* as  
310 an early divergent lineage sister to the *L. minor*, *L. pfeifferi*, and *L. seminolus* clade. Contrary to  
311 the suggestion of Koopman et al. (1957) to place *L. minor* as a “race” of *L. borealis*, these data

312 indicate with high confidence that *L. minor* is a sister clade to *L. pfeifferi* and *L. seminolus* (Fig.  
313 1). The placement of *L. minor* within this clade, however, was recovered with moderate support.

314

315 The BPP analyses resulted in three alternative topologies with almost equal posterior  
316 probability support (Table 1). This indicates that the COI locus used has enough information to  
317 validate the species but only weak phylogenetic information to infer the specific placement of *L.*  
318 *minor*, a result consistent with the moderate transfer bootstrap expectation value of the  
319 phylogenetic analysis. We recognize that the idiosyncratic history of a single locus may not fully  
320 account for the evolutionary history of a species (Collins and Cruickshank 2012; Alvarado-  
321 Serrano and Hickerson 2016). Nevertheless, as shown in simulation studies (Zhang et al. 2014),  
322 the error rate of inferring species delimitation by BPP is low, even when using a single locus.  
323 Our estimated guide tree (see Phylogenetic Inference in Methods) was robust and able to  
324 overcome the high false positive rates of species delimitation estimates associated when using a  
325 random guide tree (Leaché and Fujita 2010; Yang and Rannala 2014; Zhang et al. 2014). Finally,  
326 we confirmed the reliability of the delimitation results in two ways. First, we independently  
327 examined the sensitivity of our analysis using guided and unguided analyses in BPP. Second, we  
328 implemented three different starting delimitation models in mPTP, a single locus species  
329 delimitation approach that is conservative and likely to represent the true species clusters (Blair  
330 and Bryson 2017; Kapli et al. 2017). All species delimitation analyses strongly supported the  
331 four species tree hypothesis (Fig. 1; Table 1). Combined, these steps provided phylogenetic  
332 confirmation of *L. minor* as a unique lineage separate from *L. borealis* and established a platform  
333 to further examine the validity of this species from an independent phenotypic perspective.

334

335           The *L. minor* specimens available to us for examination were fossils (1690–570 cal. yr.  
336 BP) and represent the largest sample of Minor Red Bats available to date (Soto-Centeno et al.  
337 2017). A conservative total of seven characters was used to develop a phenotypic dataset of  
338 cranial linear measurements because some fossils had missing fragments. We organized these  
339 characters into species groups a priori based on the genetic evidence discussed above. The LDA  
340 classification model, thus, was explicitly designed to test whether these independent characters  
341 could explain the species limits observed. Some authors understandably regarded the paucity of  
342 phenotypic variation as a cautionary note to make taxonomic decisions about *L. minor*  
343 (Koopman et al. 1957; Gannon et al. 2005; Cláudio 2019). The LDA classification model we  
344 present uncovered that phenotypic variation among *L. borealis*, *L. minor*, and *L. seminolus*  
345 represents a continuum instead of the typically assumed hierarchical morphological structure  
346 (see Zapata and Jiménez 2012). Despite that continuity, phenotypic separation of *L. minor* from  
347 other Red Bats was observed along the post-orbital width and the pre-molar to molar distance  
348 represented in LD1 and LD2 (Fig. 2). It is important to note that our LDA classifier (average  
349 accuracy = 77.3%) strongly discriminated *L. minor* with a precision rate of 0.94, whereas *L.*  
350 *borealis* and *L. seminolus* obtained a precision rate of 0.65 and 0.70, respectively. This  
351 emphasizes the phenotypic distinction of *L. minor* despite the lack of morphological variation  
352 noted by other authors (Koopman et al. 1957). In contrast, *L. borealis* and *L. seminolus* showed  
353 greater phenotypic similarity as confirmed by their broader overlap (Fig. 2). If additional  
354 characters with better phenotypic signal were chosen (e.g. from recent specimens), we would  
355 expect the separation of *L. minor* to become better defined.

356



357 Species descriptions, diagnosis, and delimitation are often proposed using a few  
358 specimens and characters (e.g. Miller 1931; and many others). The interpretation of diagnosable  
359 morphological characters can include substantial subjectivity, especially in species that span a  
360 broad geographic range and environmental conditions (Cadena et al. 2017). We avoided this  
361 pitfall by combining the quantification of character shapes under a modelling approach that  
362 accounts for all components that describe such shapes (McLachlan and Peel 2000; Iwata and  
363 Ukai 2002; Scrucca et al. 2016; McLachlan et al. 2019). These methods are replicable and free of  
364 bias from subjective interpretations of investigators; thus, adding a more robust and stable  
365 examination character diagnosability. Under this framework, we reevaluated the validity of the  
366 four diagnosable characters proposed by Miller (1931) to delimit *L. minor* from other closely  
367 related Red Bats. The morphological variation captured in our SHAPE analysis and used as input  
368 for our GMMs provided a robust way to test the discriminant efficacy of skull and tooth shapes.  
369 Our results showed that the probability distributions of these principal components have different  
370 degrees of effectiveness in discriminating the different morphological clusters into each Red Bat  
371 species. Two of these characters, the roundness and flatness of the braincase, had little  
372 discrimination power (Fig. 3A, B). In contrast, we showed that the shape of the lacrimal ridge  
373 and the shape of the last upper premolar (PM<sup>4</sup>) were more diagnosable and potentially useful for  
374 biologists to discriminate *L. minor* from *L. borealis* or *L. seminolus* (Fig. 3C, D).

375

376 Based on the results of character shapes, *L. minor* can be diagnosed by having a reduced  
377 lacrimal ridge and a PM<sup>4</sup> that lacks a distinctive hypoconal basin (Fig. 3C, D). However, we  
378 caution that due to the breadth of variability of these characters observed among *L. borealis*, *L.*  
379 *minor*, and *L. seminolus*, morphological identification in the field could still be challenging.

380 There are few places where Red Bats in the Caribbean occur in high densities. Therefore, field  
381 comparisons of these characters based on a single or a few captured individuals may lead to  
382 misidentifications, particularly in geographic areas where all species may occur in sympatry (e.g.  
383 the Bahamas). We believe that this character variability and the paucity of specimens examined  
384 from an area of sympatry led Koopman et al. (1957) to the conclusion that without appropriate  
385 evidence it is best to synonymize *L. minor* with *L. borealis*.

386

387 Integrative analyses can improve the robustness of species limits and validation analyses.  
388 A diverse framework linking genetic and phenotypic evidence ultimately enhances taxonomic  
389 stability and can support conservation and ecological research particularly in poorly documented  
390 or uncommon species (Padial et al. 2010; Fujita et al. 2012). Our study combined three  
391 independent lines of evidence to validate the species status of *L. minor* and objectively assess the  
392 diagnosable traits separating it from other Red Bats. Notwithstanding, we identified further  
393 questions that must be addressed to fully evaluate populations of *L. minor* across the Caribbean.  
394 These include, for example, 1. Thorough assessments of the species limits in the Bahamas where  
395 multiple Red Bats may occur in sympatry. 2. Evaluation of the range extent, density, and  
396 environmental requirements. 3. Phylogeographic analyses to document interisland gene flow or  
397 population structure. On a phylogenetic scale, obtaining proper data from *L. pfeifferi* and *L.*  
398 *degelidus* to examine them in a broader phylogenetic context with other Red Bats in an approach  
399 similar to what we present herein could help uncover patterns of morphological and genetic  
400 variation. These are particularly important in the broader sense of Caribbean biogeography to  
401 better understand local biodiversity, develop proper species assessments, and untangle the factors  
402 that help shape local insular communities.

403

404

#### ACKNOWLEDGMENTS

405

We are grateful for the legacy of decades of work on Caribbean paleofauna and

406

contributions by C.A. Woods and other members of his field crew who collected the *L. minor*

407

specimens used in our study. R. Hulbert at the Vertebrate Paleontology Department at UF

408

provided access to *L. minor* specimens and processed the necessary loans. N.B. Simmons and

409

N.P. Duncan provided access and loans to the comparative material of other Red Bats housed in

410

the Mammalogy Collections at American Museum of Natural History. I.R. Hays kindly aided

411

with measuring, photographing, and creating shapes from specimens. We are indebted to B. da

412

Silva Fonseca and R.D. Barrilito for logistical support critical for the completion of this study.

413

Work by JAS-C was partly supported by a Rutgers University Research Council Award. Work

414

by CCA was funded by a postdoctoral scholarship at the Soto Lab of Bat Biology (SLaBB) at

415

Rutgers University. Identification of fossil *L. minor* specimens was done by JAS-C and

416

financially supported by a National Science Foundation (DEB-2135257) award to JAS-C.

417

418

419

## SUPPLEMENTARY DATA

420

*Supplementary Data SD1.*—Database of loaned specimens examined to assess

421

phenotypic species limits and shape descriptors of Red Bats. See file

422

SupplementaryDataSD1.xls.

423

424

*Supplementary Data SD2.*—Contour traces used in our SHAPE Analysis. Four profiles

425

were selected representing Miller's (1931) *L. minor* diagnostic characters: A) Dorsal view to

426

capture skull roundness; B) Posterior view, examining the level of flatness across the dorsal

427

surface of the brain case; C) Dorsal view to assess level of development and projection of the

428

lacrimal ridge, which was framed inside a cropping box and scaled to grid paper in the

429

background of the photo, and oriented consistently across the profile maxillary with placement

430

markers built into the cropping frame; and D) Lateral view of the mandible, capturing the

431

contour of the last upper premolar PM<sup>4</sup>. The selected areas were converted into black and white

432

silhouettes for analysis in the program SHAPE v1.3 (Iwata & Ukai, 2002).

433

434

*Supplementary Data SD3.*—Uncorrected p genetic distances estimated for 657 bp of the

435

mitochondrial cytochrome oxidase I (COI) gene in Red Bats (*Lasiurus borealis*, *L. minor*, *L.*

436

*pfeifferi*, and *L. seminolus*). Values along the diagonal represent within group genetic distances,

437

and values below the diagonal represent between group genetic distances. Intraspecific variation

438

not included for *L. pfeifferi* because N = 1.

439

440

## LITERATURE CITED

- 441 Allen, G. M., and C. C. Sanborn. 1937. Notes on Bats from the Bahamas. *Journal of*  
442 *Mammalogy* 18:226–228.
- 443 Alvarado-Serrano, D. F., and M. J. Hickerson. 2016. Spatially explicit summary statistics for  
444 historical population genetic inference. *Methods in Ecology and Evolution* 7:418–427.
- 445 Baird, A. B., J. K. Braun, M. A. Mares, J. C. Morales, J. C. Patton, C. Q. Tran, and J. W.  
446 Bickham. 2015. Molecular systematic revision of tree bats (Lasiurini): doubling the native  
447 mammals of the Hawaiian Islands. *Journal of Mammalogy* 96:1255–1274.
- 448 Baker, R. J., J. C. Patton, and H. H. Genoways. 1988. Genetic studies of *Lasiurus* (Chiroptera:  
449 *Vespertilionidae*). *Occasional Papers, Museum of Texas Tech University* 117:1–14.
- 450 Blair, C., and R. W. Bryson. 2017. Cryptic diversity and discordance in single-locus species  
451 delimitation methods within horned lizards (*Phrynosomatidae*: *Phrynosoma*). *Molecular*  
452 *Ecology Resources* 17:1168–1182.
- 453 Van Buuren, S., and K. Groothuis-Oudshoorn. 2011. Multivariate Imputation by Chained  
454 Equations. *Journal Of Statistical Software* 45:1–67.
- 455 Cadena, C. D., F. Zapata, and I. Jiménez. 2017. Issues and Perspectives in Species Delimitation  
456 using Phenotypic Data: Atlantean Evolution in Darwin’s Finches. *Systematic Biology*  
457 67:181–194.
- 458 Carstens, B. C., T. a. Pelletier, N. M. Reid, and J. D. Satler. 2013. How to fail at species  
459 delimitation. *Molecular Ecology* 22:4369–4383.
- 460 Clare, E. L., B. K. Lim, M. B. Fenton, and P. D. N. Hebert. 2011. Neotropical bats: estimating  
461 species diversity with DNA barcodes. *PloS one* 6:e22648.
- 462 Cláudio, V. C. 2019. *Lasiurus minor*. Pp. 879–880 in *Handbook of the Mammals of the World*.

- 463 Vol. 9. Bats (D. E. Wilson & R. A. Mittermeier, eds.). Lynx Edicions, Barcelona.
- 464 Collins, R. a., and R. H. Cruickshank. 2012. The seven deadly sins of DNA barcoding.
- 465 Molecular Ecology Resources 13:969–975.
- 466 Coyne, J. A., and H. A. Orr. 2004. Speciation. Sinauer Associates, Sunderland, MA.
- 467 Flouri, T., X. Jiao, B. Rannala, and Z. Yang. 2018. Species tree inference with BPP using
- 468 genomic sequences and the multispecies coalescent. Molecular Biology and Evolution
- 469 35:2585–2593.
- 470 Fraley, C., and A. E. Raftery. 2002. Model-Based Clustering, Discriminant Analysis, and
- 471 Density Estimation. Journal of American Statitital Association 97:611–631.
- 472 Fujita, M. K., A. D. Leaché, F. T. Burbrink, J. A. McGuire, and C. Moritz. 2012. Coalescent-
- 473 based species delimitation in an integrative taxonomy. Trends in Ecology and Evolution
- 474 27:480–488.
- 475 Gannon, M. R., A. Kurta, A. Rodríguez-Durán, and M. R. Willig. 2005. Bats of Puerto Rico: An
- 476 island focus and a Caribbean perspective. 1st ed. Texas Tech University Press, Lubbock,
- 477 TX.
- 478 Iwata, H., and Y. Ukai. 2002. SHAPE: a computer program package for quantitative evaluation
- 479 of biological shapes based on elliptic Fourier descriptors. Journal of Heredity 93:384–385.
- 480 Jacobs, D. S. 1996. Morphological divergence in an insular bat, *Lasiurus cinereus semotus*.
- 481 Functional Ecology 10:622–630.
- 482 Kapli, P., S. Lutteropp, J. Zhang, K. Kobert, P. Pavlidis, A. Stamatakis, and T. Flouri. 2017.
- 483 Multi-rate Poisson Tree Processes for single-locus species delimitation under Maximum
- 484 Likelihood and Markov Chain Monte Carlo. Bioinformatics 33: 1630–1638.
- 485 Koopman, K. F., M. K. Hecht, and E. Ledecky-Janecek. 1957. Notes on the mammals of the

- 486 Bahamas with special reference to the bats. *Journal of Mammalogy* 38:164–174.
- 487 Kozlov, A. M., D. Darriba, T. Flouri, B. Morel, and A. Stamatakis. 2019. RAxML-NG: a fast,  
488 scalable and user-friendly tool for maximum likelihood phylogenetic inference.  
489 *Bioinformatics* 35:4453–4455.
- 490 Kuhn, M. 2020. caret: Classification and Regression Training. R package version 6.0–86.
- 491 Kuhn, M., and K. Johnson. 2013. Applied predictive modeling. Springer, New York, NY.
- 492 Leaché, A. D., and M. K. Fujita. 2010. Bayesian species delimitation in West African forest  
493 geckos (*Hemidactylus fasciatus*). *Proceedings of the Royal Society B: Biological Sciences*  
494 277:3071–3077.
- 495 Lemoine, F., J. B. Domelevo Entfellner, E. Wilkinson, D. Correia, M. Dávila Felipe, T. De  
496 Oliveira, and O. Gascuel. 2018. Renewing Felsenstein’s phylogenetic bootstrap in the era of  
497 big data. *Nature* 556:452–456.
- 498 Lim, B. K., L. O. Loureiro, N. S. Upham, and J. L. Brocca. 2017. Phylogeography of Dominican  
499 Republic bats and implications for systematic relationships in the Neotropics. *Journal of*  
500 *Mammalogy* 98:986–993.
- 501 McLachlan, G. J., S. X. Lee, and S. I. Rathnayake. 2019. Finite Mixture Models. *Annual Review*  
502 *of Statistics and Its Application* 6:355–378.
- 503 McLachlan, G., and D. Peel. 2000. Finite Mixture Models. John Wiley & Sons, Inc., Hoboken,  
504 NJ, USA.
- 505 Miller, G. S. 1931. The Red Bats of the Greater Antilles. *Journal of Mammalogy* 12:409–410.
- 506 Padial, J. M., A. Miralles, I. De la Riva, and M. Vences. 2010. The integrative future of  
507 taxonomy. *Frontiers in Zoology* 7:1–14.
- 508 Pattengale, N. D., M. Alipour, O. R. Bininda-Emonds, B. M. Moret, and A. Stamatakis. 2010.

- 509        How many bootstrap replicates are necessary? *Journal of Computational Biology* 17:337–  
510        354.
- 511    Penone, C. et al. 2014. Imputation of missing data in life-history trait datasets: which approach  
512        performs the best? *Methods in Ecology and Evolution* 5:961–970.
- 513    Queiroz, K. De. 2005. Ernst Mayr and the modern concept of species. *Proceedings of the*  
514        *National Academy of Sciences* 102:6600–6607.
- 515    Rambaut, A., A. J. Drummond, D. Xie, G. Baele, and M. A. Suchard. 2018. Posterior  
516        Summarization in Bayesian Phylogenetics Using Tracer 1.7. *Systematic Biology* 67:901–  
517        904.
- 518    Robinson, D., and L. Foulds. 1981. Comparison of phylogenetic trees. *Mathematical Biosciences*  
519        53:131–147.
- 520    Rodríguez-Durán, A. 1999. First record of reproductive *Lasiurus borealis minor* (Miller) from  
521        Puerto Rico (Chiroptera). *Caribbean Journal of Science* 35:143–144.
- 522    Schneider, C. A., W. S. Rasband, and E. K.W. 2012. NIH Image to ImageJ: 25 years of image  
523        analysis. *Nature Methods* 9:671–675.
- 524    Scrucca, L., M. Fop, T. B. Murphy, and A. E. Raftery. 2016. mclust 5: Clustering, Classification  
525        and Density Estimation Using Gaussian Finite Mixture Models. *The R Journal* 8:289–317.
- 526    Silva Taboada, G. 1979. Los murciélagos de Cuba. Editorial de la Academia de Ciencias de  
527        Cuba, La Habana.
- 528    Simmons, N. B. 2005. Order Chiroptera. Pp. 312–529 in *Mammal species of the world: A*  
529        *taxonomic and geographic reference* (D. E. Wilson & D. M. Reeder, eds.). 3rd edition. The  
530        John Hopkins University Press, Baltimore, MD.
- 531    Simmons, N. B., and A. L. Cirranello. 2020. *Bat Species of the World: A taxonomic and*



- 532 geographic database. <<https://batnames.org>>.
- 533 Soto-Centeno, J. A., N. B. Simmons, and D. W. Steadman. 2017. The bat community of Haiti  
534 and evidence for its long-term persistence at high elevations. *PLoS ONE* 12:e0178066.
- 535 Speer, K. A., J. A. Soto-centeno, N. A. Albury, Z. Quicksall, M. G. Marte, and D. L. Reed. 2015.  
536 Bats of the Bahamas: natural history and conservation. *Bulletin of the Florida Museum of*  
537 *Natural History* 53:45–95.
- 538 Starret, A., and F. J. Rolle. 1962. A record of the genus *Lasiurus* from Puerto Rico. *Journal of*  
539 *Mammalogy* 44:264.
- 540 Streicker, D. G., A. S. Turmelle, M. J. Vonhof, I. V. Kuzmin, G. F. McCracken, and C. E.  
541 Rupprecht. 2010. Host phylogeny constrains cross-species emergence and establishment of  
542 rabies virus in bats. *Science* 329:676–679.
- 543 Venables, W. N., and B. D. Ripley. 2002. *Modern Applied Statistics with S*. 4th ed. Springer,  
544 New York, NY.
- 545 Yang, Z., and B. Rannala. 2014. Unguided species delimitation using DNA sequence data from  
546 multiple loci. *Molecular Biology and Evolution* 31:3125–3135.
- 547 Zapata, F., and I. Jiménez. 2012. Species delimitation: Inferring gaps in morphology across  
548 geography. *Systematic Biology* 61:179–194.
- 549 Zhang, C., B. Rannala, and Z. Yang. 2014. Bayesian species delimitation can be robust to guide-  
550 tree inference errors. *Systematic Biology* 63:993–1004.
- 551

552

## FIGURE LEGENDS

553 Figure 1. Maximum Likelihood phylogeny of mitochondrial COI sequences of Red Bats (genus  
554 *Lasiurus*). Colored circles at nodes represent Transfer Bootstrap Expectation (TBE) values  
555 estimated in RaxML-NG. Each vertical bar corresponds to summarized results of mPTP and BPP  
556 species delimitation analyses based on the concise alignment. Both mPTP and BPP results agree  
557 on four species, supporting the validity of *Lasiurus minor*.

558

559 Figure 2. Results from the machine learning LDA classifier of phenotypic limits in Red Bats  
560 (genus *Lasiurus*). Overall accuracy of the model = 77.3% (95% CI: 70.3–81.8%). Percent group  
561 separation described for the first linear discriminant (LD1) was 86.9 and 13.1 for the second  
562 linear discriminant (LD2). Solid lines represent 68% data ellipses to visualize phenotypic overlap  
563 among species. LD1 density values plotted for aid in visualization on the x-axis where *L. minor*  
564 separates from *L. borealis* and *L. seminolus*. *L. pfeifferi* was not included in this analysis due to  
565 low sample size.

566

567 Figure 3. Shape variation of Red Bat diagnostic characters proposed by Miller (1931) and PCA  
568 scatterplots showing the morphospace occupied by *L. borealis*, *L. minor*, and *L. seminolus*. A)  
569 dorsal view of the skull representing the roundness of the braincase, B) posterior view of the  
570 skull representing the flatness of the braincase, C) dorsal views of the skull showing structural  
571 differences of the lacrimal ridge, and D) lateral view of the last upper premolar (PM4). The left  
572 panel shows the range (i.e. mean  $\pm$ 2 SD) for each shape examined under the first two principal  
573 components. Shape highlighted in black indicates the closest shape estimate representing *L.*  
574 *minor*. For details of image processing see Supplementary Data SD2.

575 Table 1. Outline of priors and posterior probability results for species delimitation analyses of Red Bats in BPP. Two main analyses  
576 were run using a fixed guide tree (A01) or unguided (A11). Two different prior scenarios were examined under the different analyses  
577 based on population size (inverse gamma  $\theta = \alpha, \beta$ ) and divergence time differences (inverse gamma  $\tau = \alpha, \beta$ ). In the case of  
578 population size,  $\beta$  was estimated from the mutation rate of COI gene sequences and then fixed for subsequent tests. In the three  
579 alternative topologies  $B = L. borealis, M = L. minor, P = L. pfeifferi,$  and  $S = L. seminolus$ . In A01 analyses, the initial topology is  
580 indicated by <sup>a</sup> and it matched the relationships obtained from best supported Maximum Likelihood tree (see Fig. 1). The combined  
581 posterior probability of the best three out of ten alternative topologies is indicated by <sup>b</sup>. P1–4 indicate the posterior probabilities of  
582 species delimitation from one to four species.

583

| Model | Prior ( $\theta$ ) | Prior ( $\tau$ ) | $((B, M), (P, S));$ | $(B, (M, (P, S)));$ | $((B, (P, S)), M);$ | P1 | P2 | P3    | P4                 |
|-------|--------------------|------------------|---------------------|---------------------|---------------------|----|----|-------|--------------------|
| A01   | IG(3, 0.008)       | IG(3, 0.02)      | 0.373               | 0.367 <sup>a</sup>  | 0.257               | 0  | 0  | 0     | 0.997 <sup>b</sup> |
| A11   | IG(3, 0.008)       | IG(3, 0.02)      | –                   | –                   | –                   | 0  | 0  | 0.017 | 0.983              |

584

585

586 Table 2. Measurements of four species of Red Bats (genus *Lasiurus*) examined in this study. Measurements represented as means with  
 587 ranges in parenthesis. Sample sizes noted in parenthesis next to each species. Character abbreviations are: Pre-M to M = Pre-molar to  
 588 Molar distance, Postorbital W = post-orbital width, Nasal to Occ. Lobe = proximate ridge of the nasal to the distal point of the  
 589 occipital lobe, L Palate = length of palate, Condylbasal L = condylbasal length, L Pterygoid Pl. = length of narrowest point of distal  
 590 surfaces of pterygoid plates, and Gleno. Mass. Muscl. = distance between the glenoid fossa to the origin of the masseter muscle.

591

| Character           | <i>L. borealis</i> (N = 78) | <i>L. minor</i> (N = 79) | <i>L. pfeifferi</i> (N = 1) | <i>L. seminolus</i> (N = 68) |
|---------------------|-----------------------------|--------------------------|-----------------------------|------------------------------|
| Pre-M to M          | 3.63 (3.33–4.08)            | 3.53 (3.24–3.79)         | 3.66                        | 3.70 (3.28–3.94)             |
| Postorbital W       | 4.35 (4.1–4.9)              | 4.53 (4.19–4.77)         | 4.71                        | 4.36 (4.11–4.60)             |
| Nasal to Occ. lobe  | 11.36 (10.67–11.99)         | 10.95 (10.41–11.58)      | 11.62                       | 11.53 (10.91–12.16)          |
| L Palate            | 4.42 (3.78–4.9)             | 4.26 (4.01–4.69)         | 4.52                        | 4.37 (4.04–4.78)             |
| Condylbasal L       | 9.51 (8.9–10.07)            | 9.18 (8.67–9.96)         | 9.71                        | 9.57 (8.84–10.20)            |
| L Pterygoid Pl.     | 2.25 (1.99–2.69)            | 2.25 (2.06–2.48)         | 2.37                        | 2.32 (2.10–2.57)             |
| Gleno. Mass. Muscl. | 2.82 (2.57–3.12)            | 2.63 (2.41–2.78)         | 2.86                        | 2.83 (2.62–3.07)             |

592

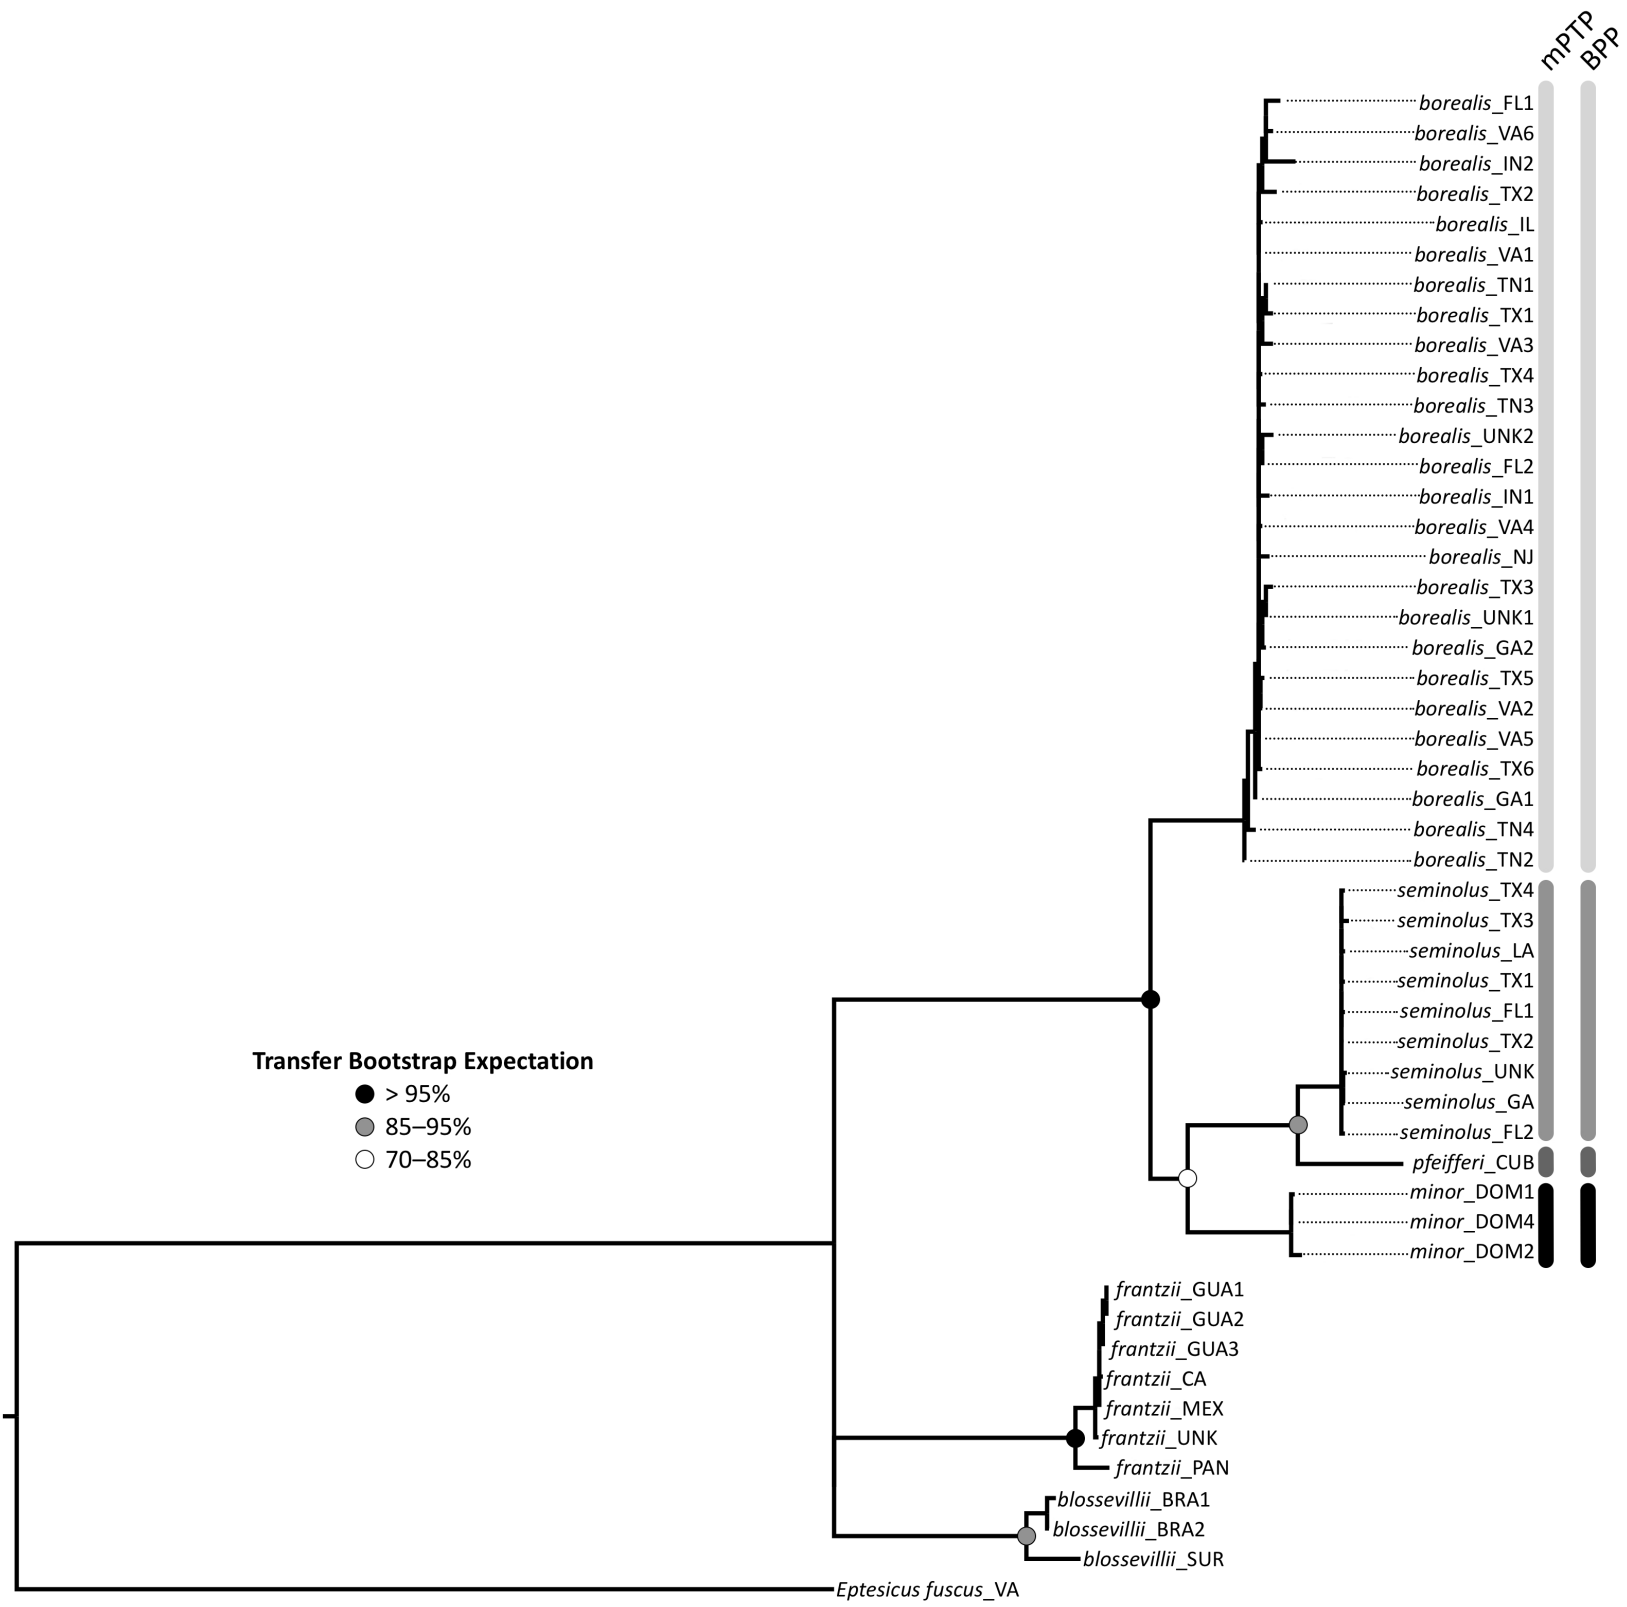

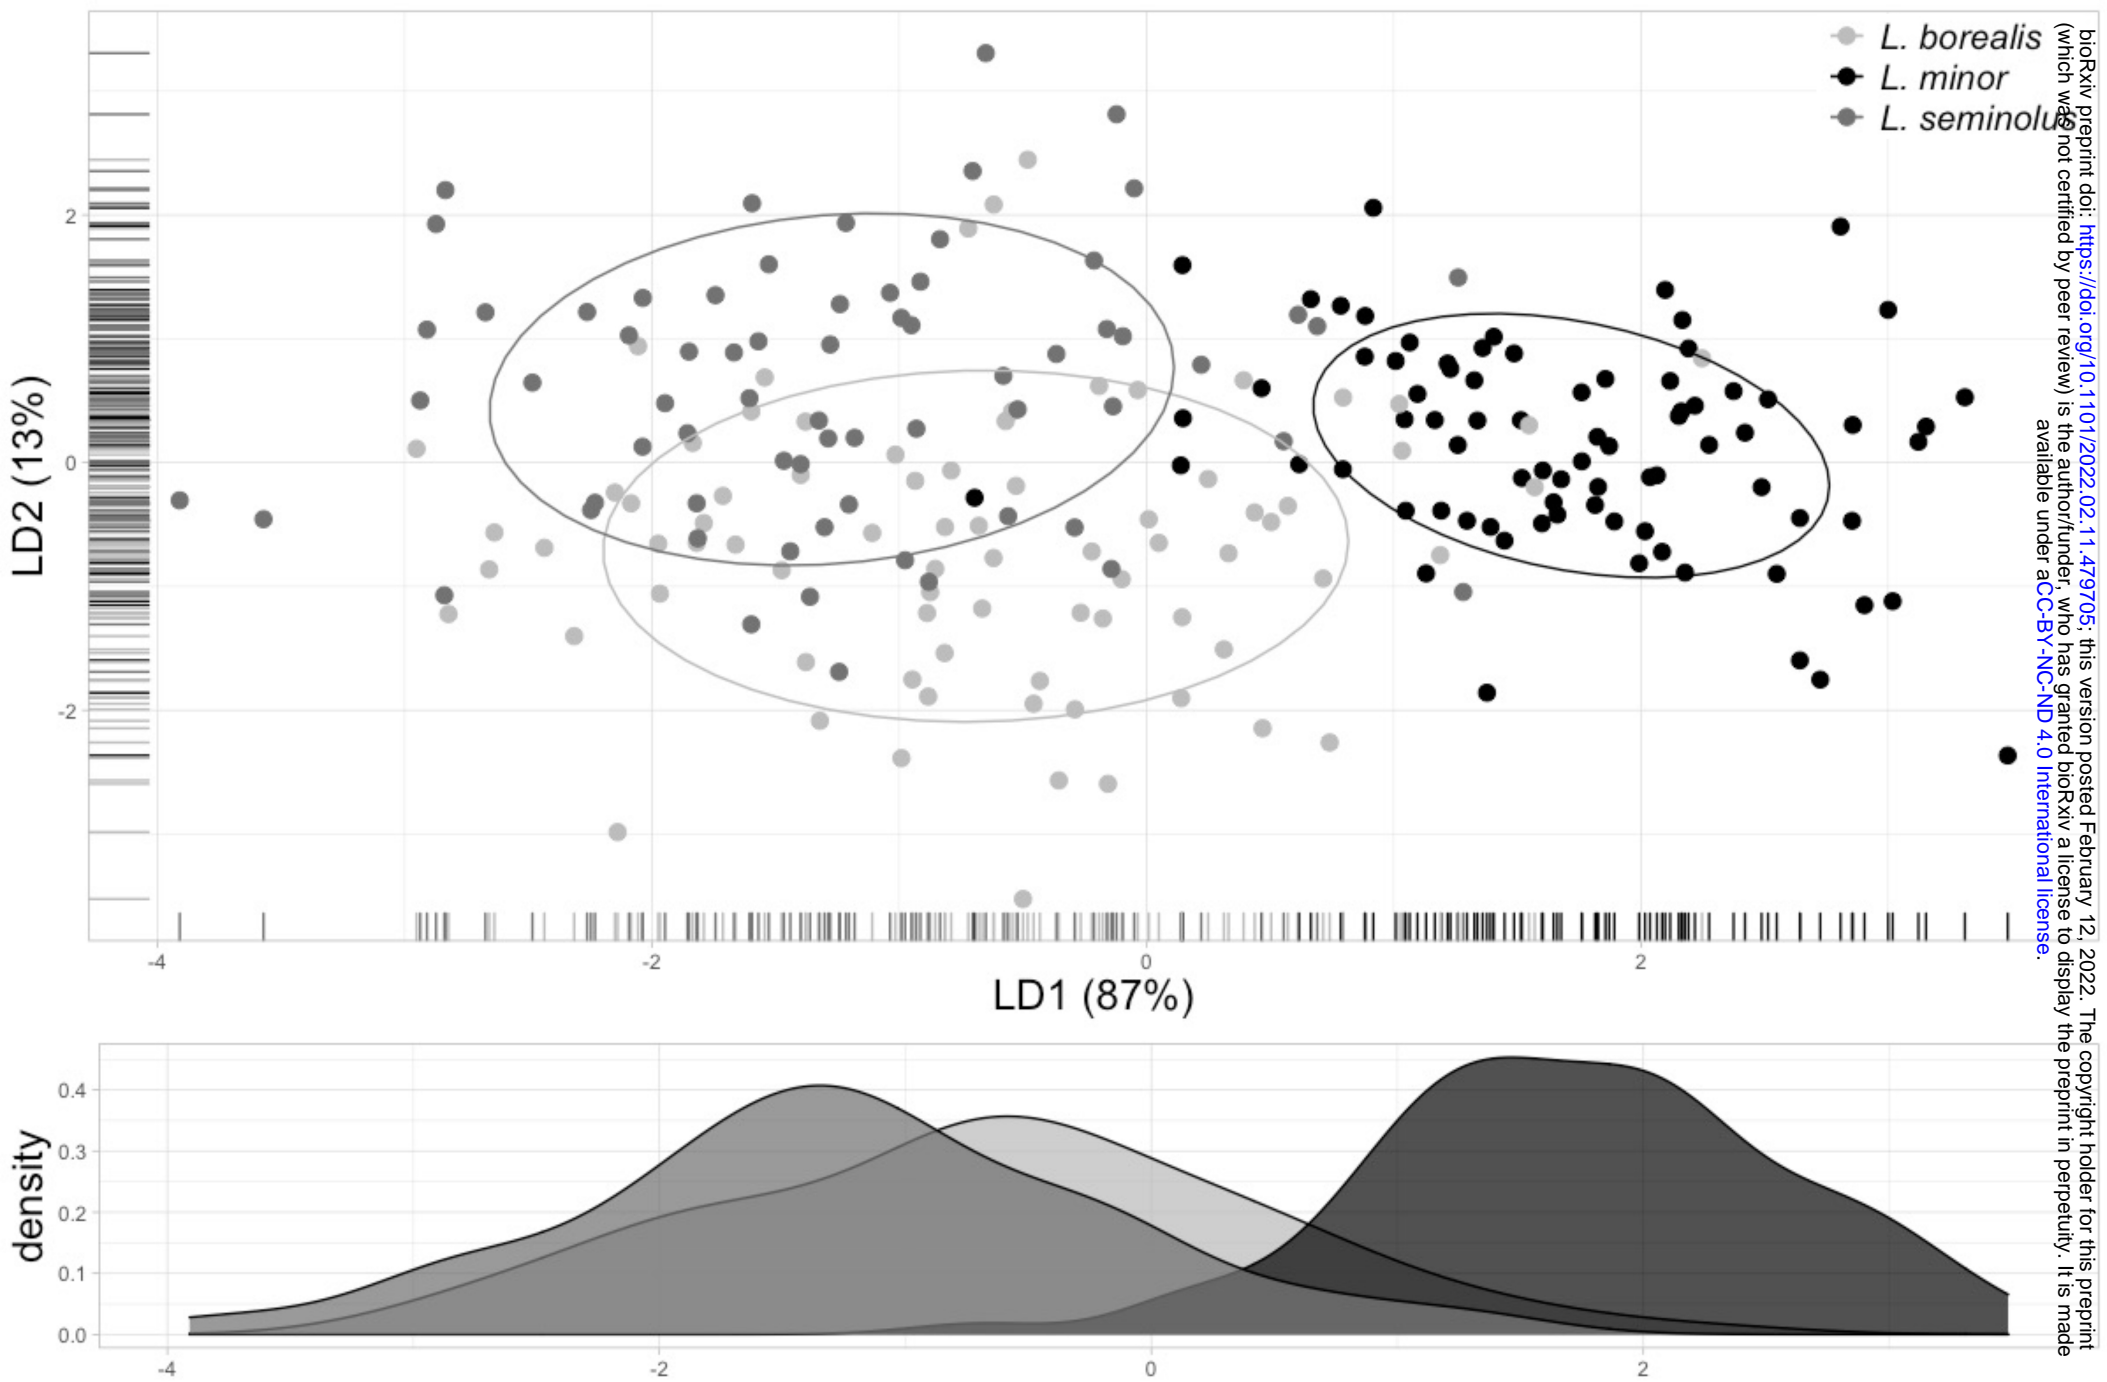

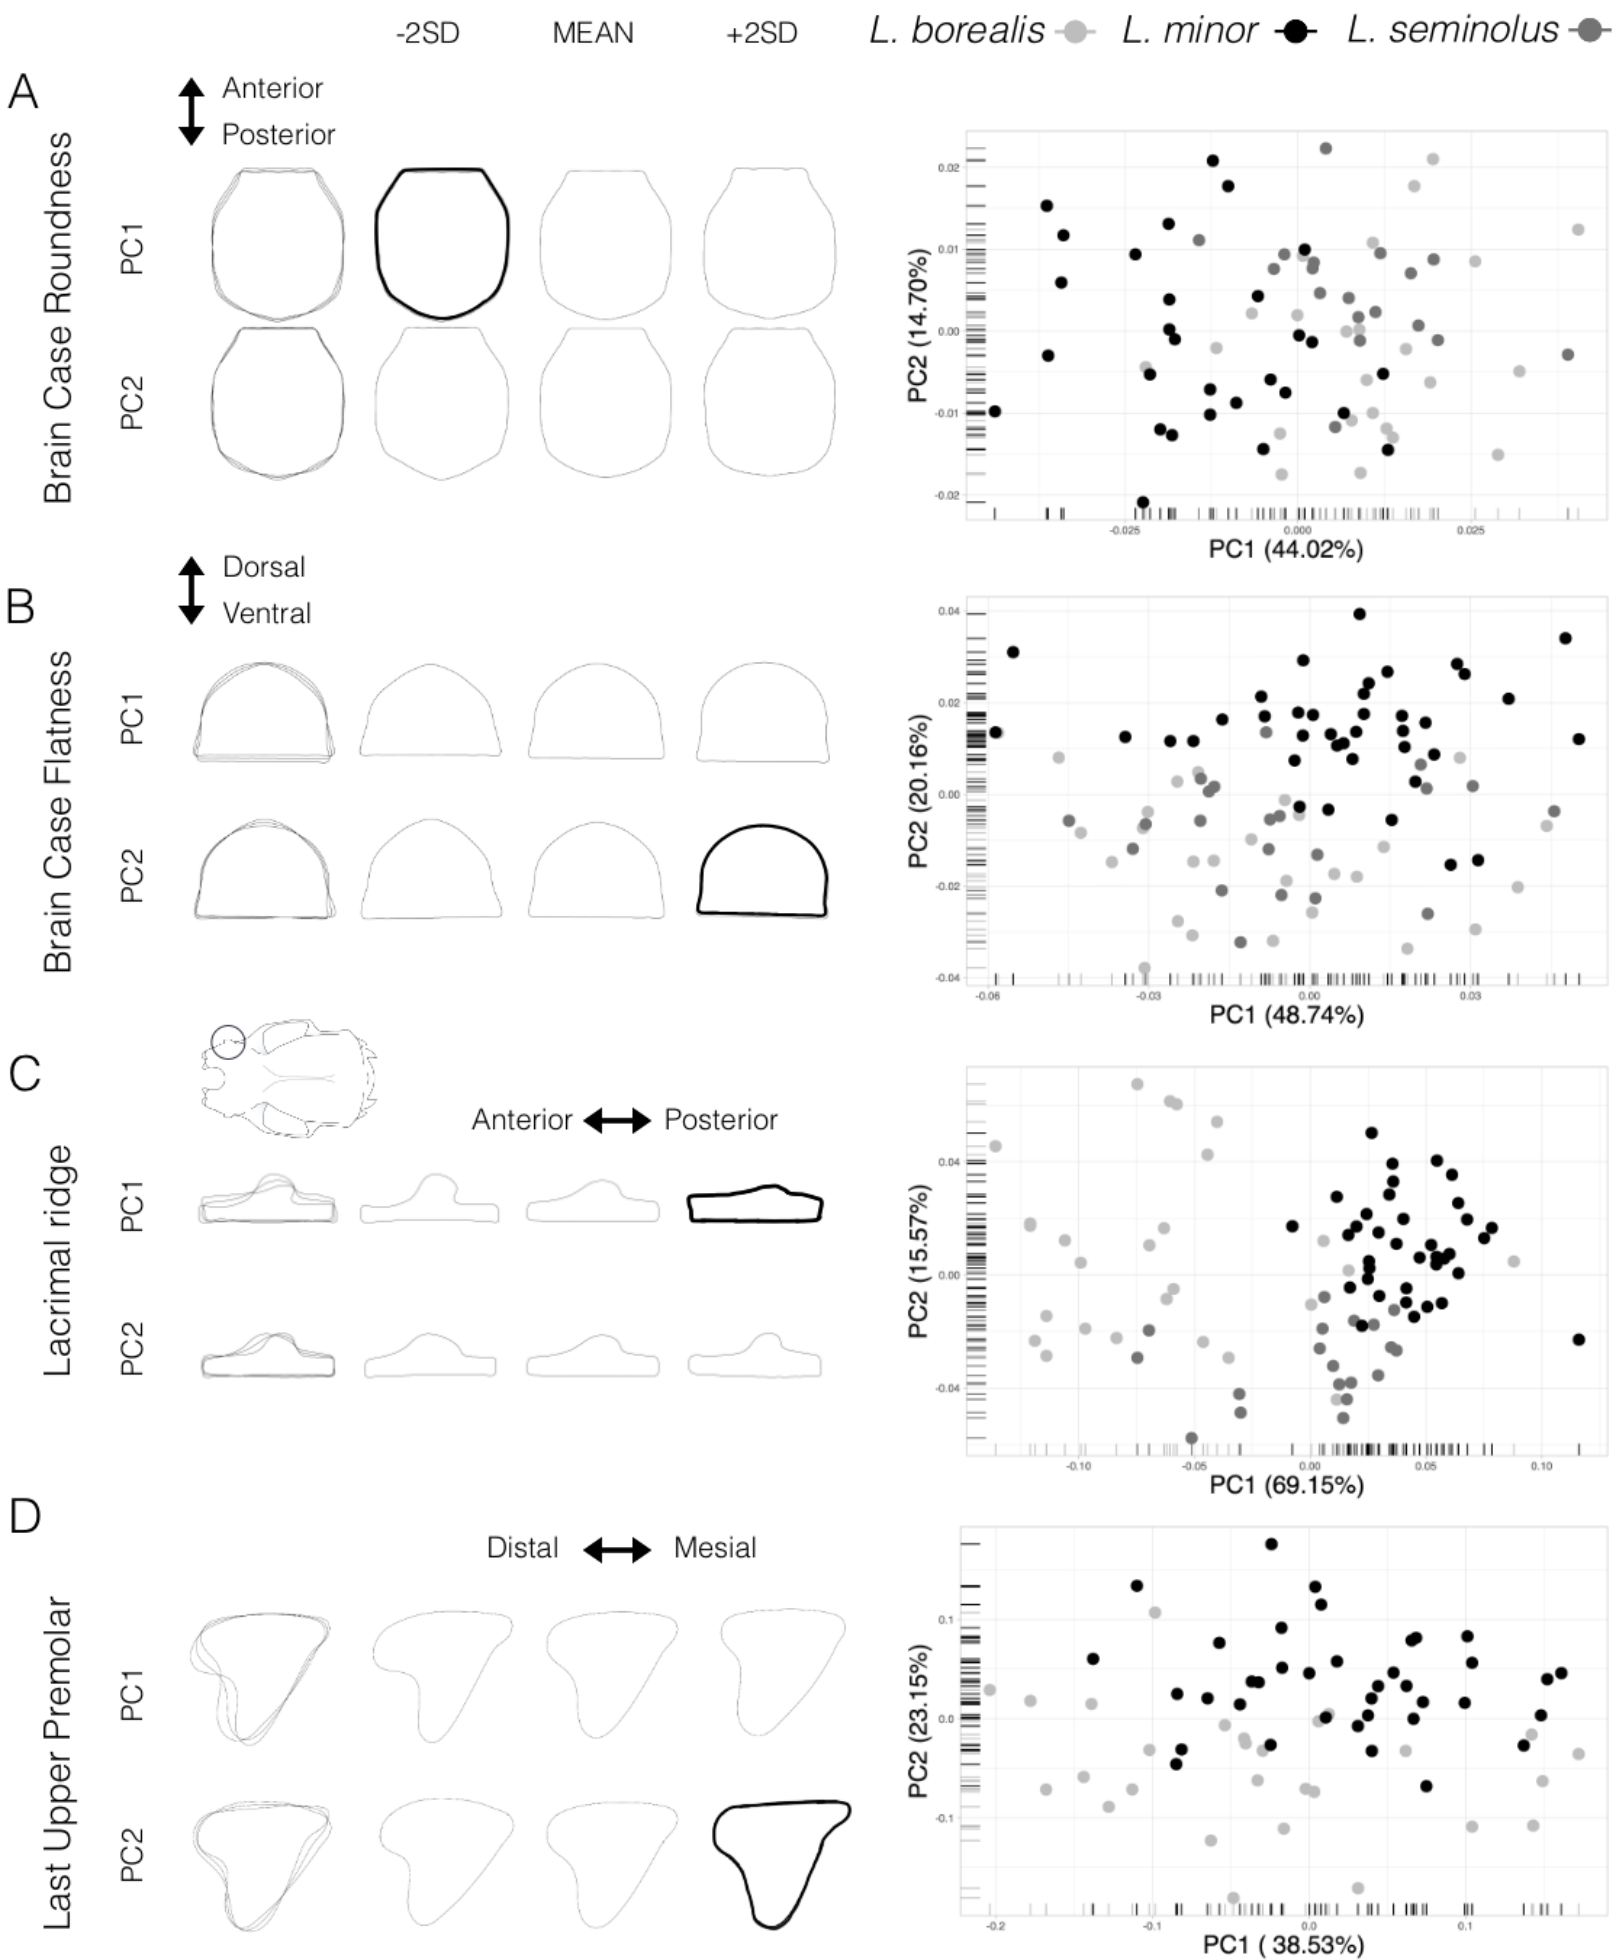

Source: https://www.biorxiv.org/content/10.1101/2022.02.11.479705v1.full.pdf
